# Supplementary material for: Internet Groupware Systems for Project Management: Experiences from a Longitudinal Study.
Source: Royal Society of Chemistry journal article supplement (doi:10.1039/c3fd00015j), 2003-01-01
Supplement: c3fd00015j.pdf [file c3fd00015j.pdf]

## Decoration of active sites to create bimetallic surfaces and its implication for electrochemical processes

Blake J. Plowman, Ilija Najdovski, Andrew Pearson and Anthony P. O'Mullane\*

*School of Applied Sciences, RMIT University, GPO Box 2476V, Melbourne, VIC 3001, Australia*

### Supplementary Information

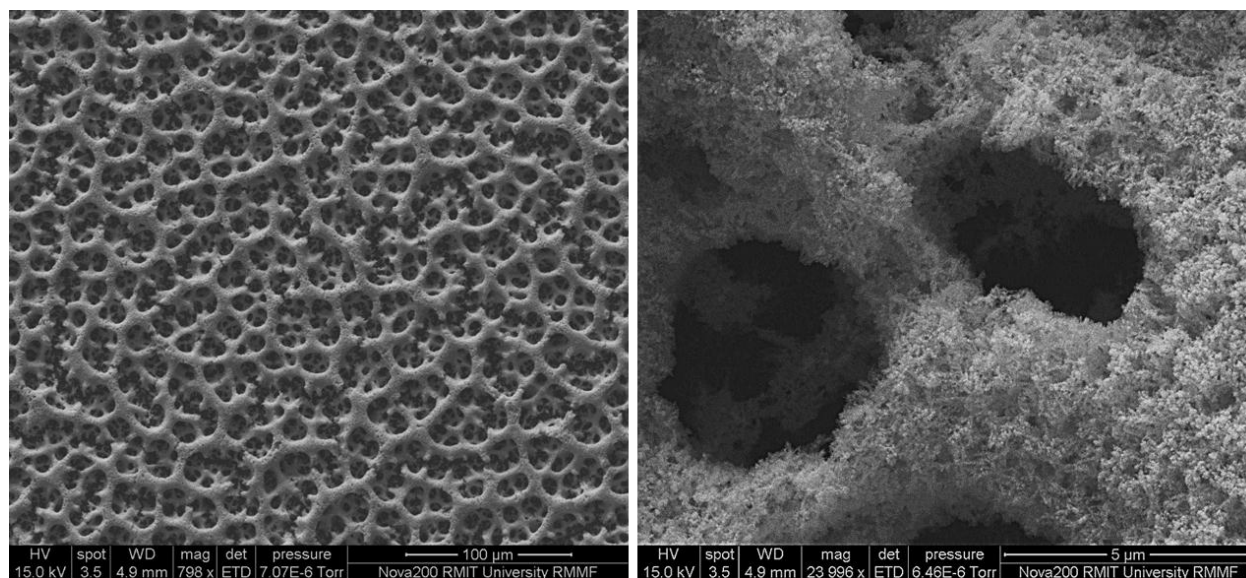

**Figure S1:** SEM images of porous honeycomb Pd formed via electrodeposition at a constant current of  $3 \text{ A cm}^{-2}$  for 30 s on a GC electrode from a solution containing 20 mM  $\text{Pd}(\text{NO}_3)_2$  in 1.5 M  $\text{H}_2\text{SO}_4$ .

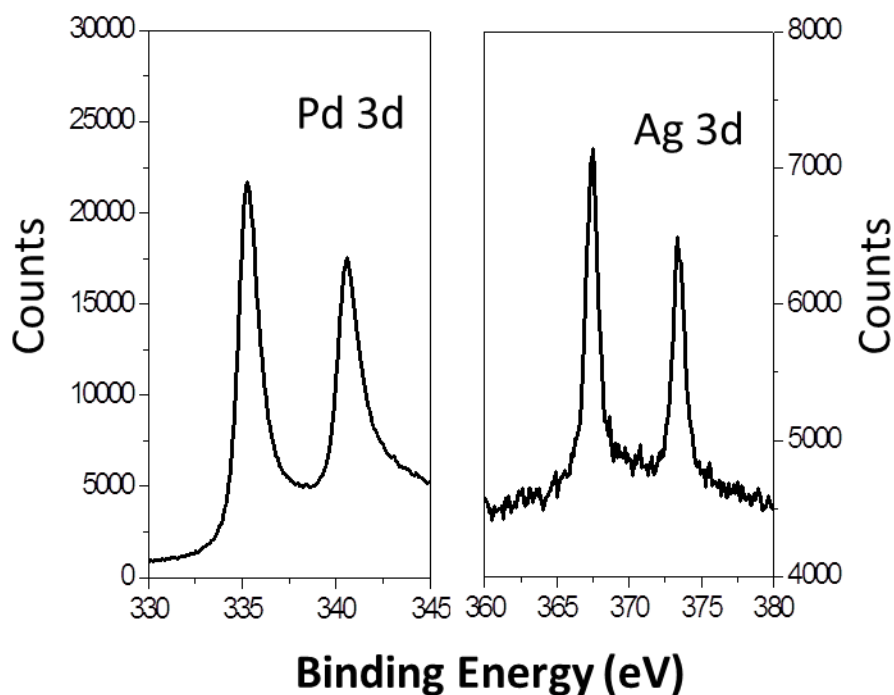

**Figure S2:** XPS spectra for electrodeposited nanostructured Pd as in Figure 2 of the main manuscript after decoration with silver.

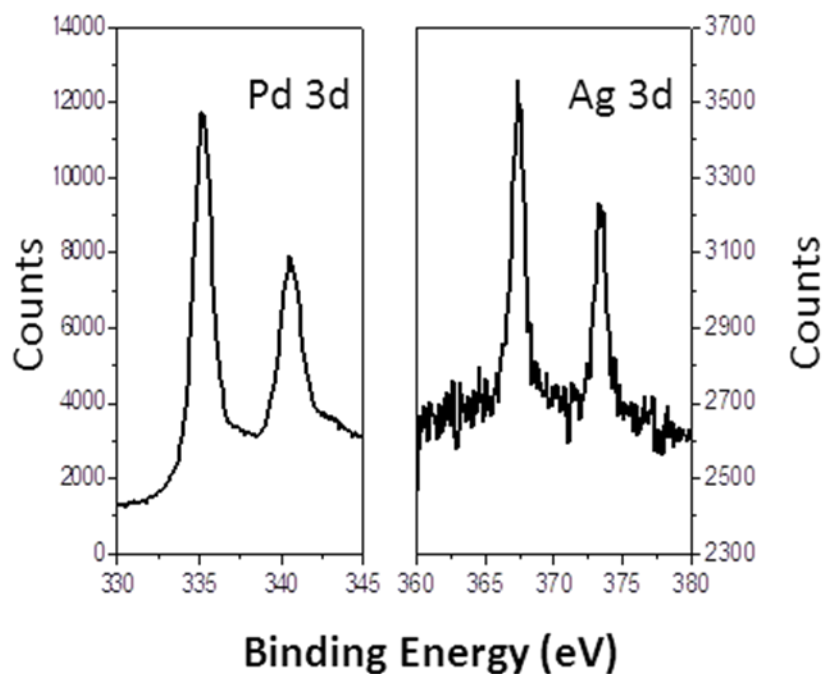

**Figure S3:** XPS spectra for Pd on carbon catalyst after decoration with silver.

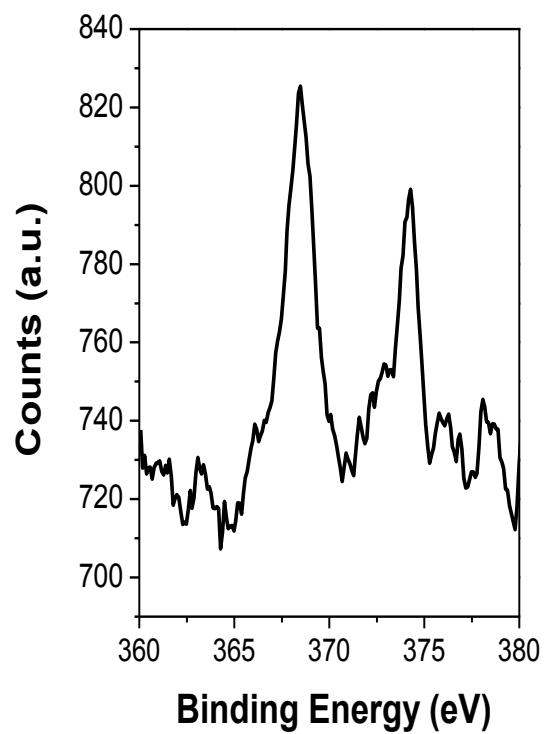

**Figure S4:** XPS Ag 3d spectrum for activated carbon that was immersed in 1 mM  $\text{AgNO}_3$ .
